# Supplementary material
Source: PubMed Central journal article supplement (PMC1877872)
Supplement: pgen.0030075.sg005.pdf [file pgen.0030075.sg005.pdf]

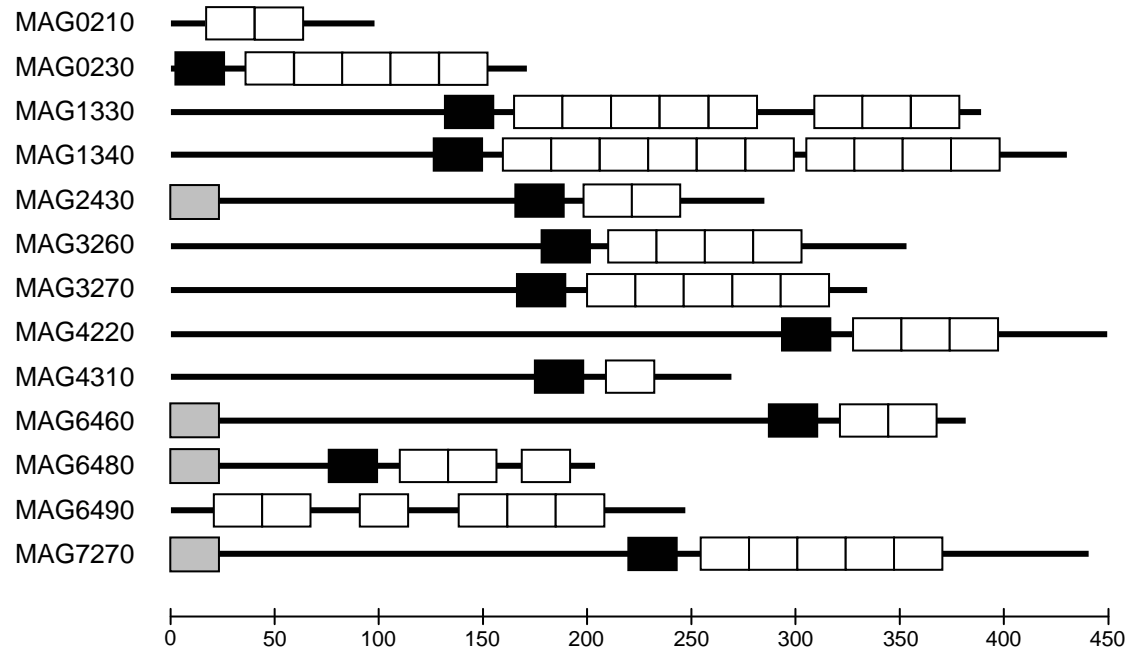

**Figure S5. Schematic representation of the 13 *M. agalactiae* proteins containing the DUF285 domain.** Motif A, which correspond to DUF285, and motif B are represented by white and black boxes, respectively. Four members of the DUF285 protein family were predicted as lipoproteins; the signal peptide is symbolized by a grey box. Protein length scale (in amino acid) is indicated.
