# Supplementary material
Source: PubMed Central journal article supplement (PMC1877872)
Supplement: pgen.0030075.sg006.pdf [file pgen.0030075.sg006.pdf]

## TraG

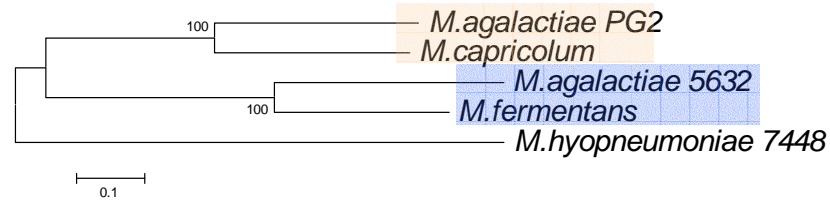

## ORF22

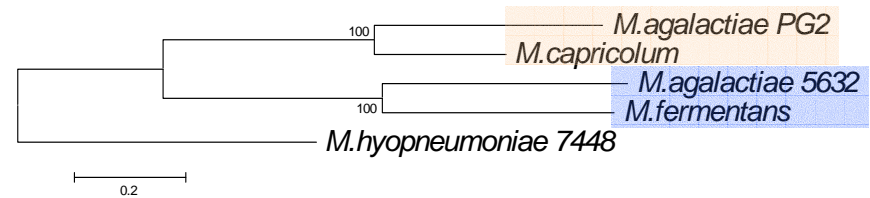

## TraE

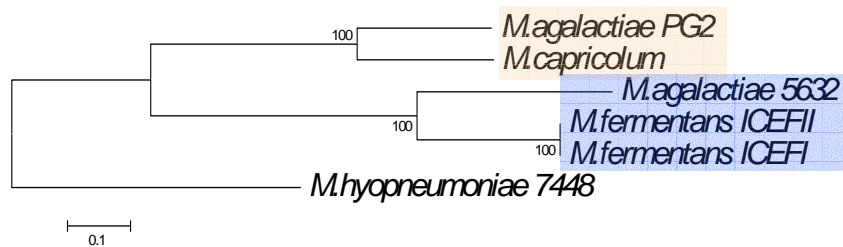

## ORF19

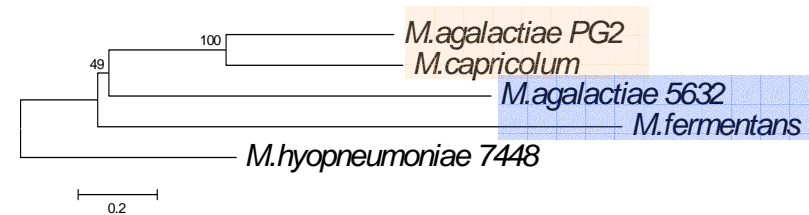

**Figure S6. Phylogenetic tree inferred from the amino acid sequence of TraG, TraE, ORF19 and ORF 22 proteins.** Bootstrap support values (based on 500 replicates) are indicated near each node of the tree. The proteins from *M. hyopneumoniae* 7448 were chosen as outgroups. The two CDSs corresponding to the degraded genes *traE* (MAG3910/MAG3920) and ORF19 (MAG3880/MAG3890) were considered to generate the multiple alignments.
