# Supplementary material
Source: PubMed Central journal article supplement (PMC1877872)
Supplement: pgen.0030075.sg007.pdf [file pgen.0030075.sg007.pdf]

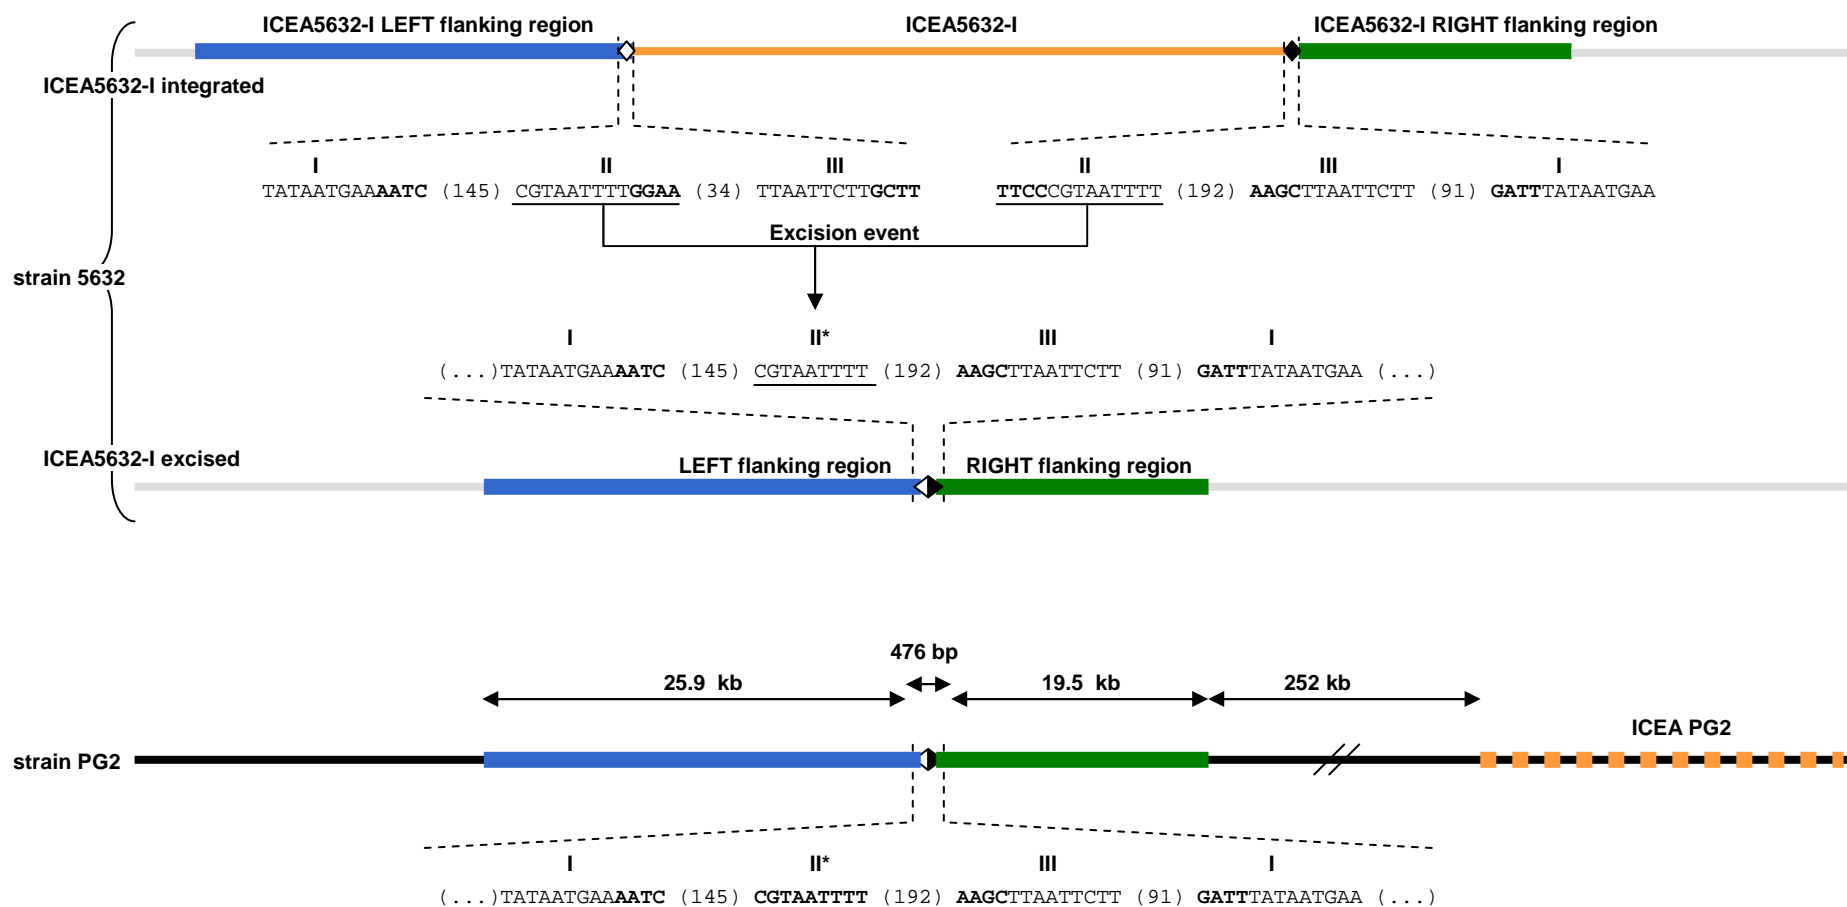

**Fig. S7. Alignment of the ICEA5632 locus from the *M. agalactiae* strain 5632 with a synthetic region from *M. agalactiae* PG2.** The thick coloured lines represent related sequences whereas grey and black lines represent non-related regions in 5632 and PG2 strains, respectively. Upper panel: the blue and green thick lines represent the large regions that flank the integrated copy of ICEA5632-I on the chromosome. The left and right end-sequences of ICEA5632-I are underlined in the close-up text; see Marena et al (2006) for details. Middle panel: ICEA5632 locus after the element excision, showing the re-organized end sequences. Lower panel: PG2 region synthetic to the reorganised ICEA5632 locus. The close-up text indicates the 476 bp sequence that is nearly identical to the ICEA5632 locus after excision of the element in strain 5632. The blue and green thick lines indicate the synthetic region between 5632 and PG2. Dashed orange line represents the ICEAPG2 locus (not to scale). The size of the different regions is indicated above the corresponding double arrows.
